# Supplementary material for: ROS-responsive microcapsule assembly from Turkish galls for ulcerative colitis therapy
Source: Royal Society of Chemistry journal article supplement (doi:10.1039/d1nj01303c), 2021-01-01
Supplement: d1nj01303c1.pdf [file d1nj01303c1.pdf]

## Supporting Information

### H<sub>2</sub>O<sub>2</sub>-responsive Microcapsules Assembly from Turkish Galls for Ulcerative Colitis Therapy

Yonghao Liu<sup>a‡</sup>, Jie Zang<sup>a‡</sup>, Mengying Lv<sup>b</sup>, Rui Xue<sup>a</sup>, Xuetao Liu<sup>a</sup>, Yuting Hu<sup>a</sup>, Wei Yu<sup>a</sup>,  
Xinjun Wang<sup>c</sup>, Bo Han<sup>\*ac</sup>

<sup>a</sup> School of Pharmacy/Key Laboratory of Xinjiang Phytomedicine Resource and Utilization,  
Ministry of Education, Shihezi University, Shihezi 832003, P. R. China.

<sup>b</sup> Institute of Translational Medicine, Medical College, Yangzhou University, Yangzhou  
210000, P. R. China.

<sup>c</sup> Sinopharm Xinjiang Pharmaceutical Co., Ltd, Urumqi 830000, P. R. China.

Corresponding Author at:

Bo Han, School of Pharmacy, Shihezi University, Xinjiang Shihezi, P. R. China.

Tel: 18999335299

Fax: +86 0993-2057150

E-mail address: 524683221@qq.com

‡ These authors contributed equally to this work.

Authors' contribution

All authors have contributed extensively to the work presented in this paper. Bo Han designed the experiments, Yonghao Liu and Jie Zang conducted the experiments, analyzed the data, prepared the figures and wrote up the manuscript. Rui Xue and Xuetao Liu helped with the data analysis. Mengying Lv and Yuting Hu reviewed the manuscript. Wei Yu and Xinjun Wang helped with the laboratory technique. The manuscript has been reviewed and approved by all authors.

## Supporting Information

Table S1 DAI scores

Fig. S1 GTA-Fe<sup>III</sup> MCPs were observed under microscope over 15 days

Fig. S2. SEM image of GTA-Fe<sup>III</sup> MCPs were incubated with the *E. coli* for 24 hours.

Fig. S3. The mass spectrum information of GTA.

Fig. S4. Mass spectrometry information of components in intestinal juice and serum.

Figure S5. The disassembly of GTA-Fe<sup>III</sup> MCPs in different concentrations of H<sub>2</sub>O<sub>2</sub> solution

Figure S6. SEM image of GTA-Fe<sup>III</sup> MCPs in 100mM H<sub>2</sub>O<sub>2</sub> solution after 120 minutes

Table S1 DAI scores

| Score | Weight loss | Stool consistency         | Blood            |
|-------|-------------|---------------------------|------------------|
| 0     | None        | Well-formed pellets       | Normal           |
| 1     | 1~5%        | Some soft                 | Slight bleeding  |
| 2     | 5~10%       | Soft                      | Certain bleeding |
| 3     | 10~20%      | Unformed or mild diarrhea | Mid bleeding     |
| 4     | >20%        | Severe watery diarrhea    | Gross bleeding   |

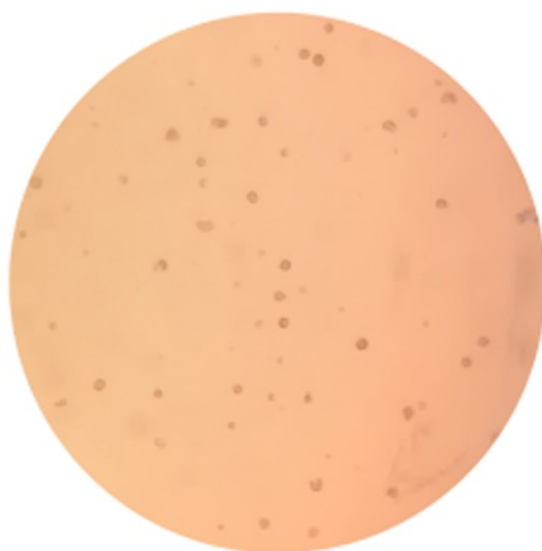

Fig. S1 GTA-Fe<sup>III</sup> MCPs were observed under microscope over 15 days

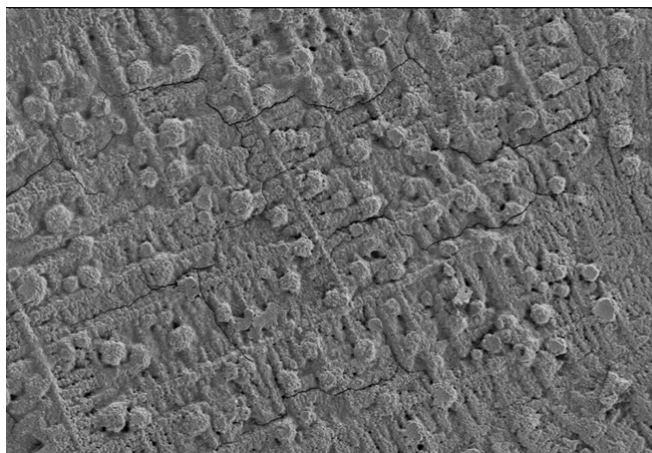

Fig. S2.SEM image of GTA-Fe<sup>III</sup> MCPs were incubated with the E. coli for 24 hours.

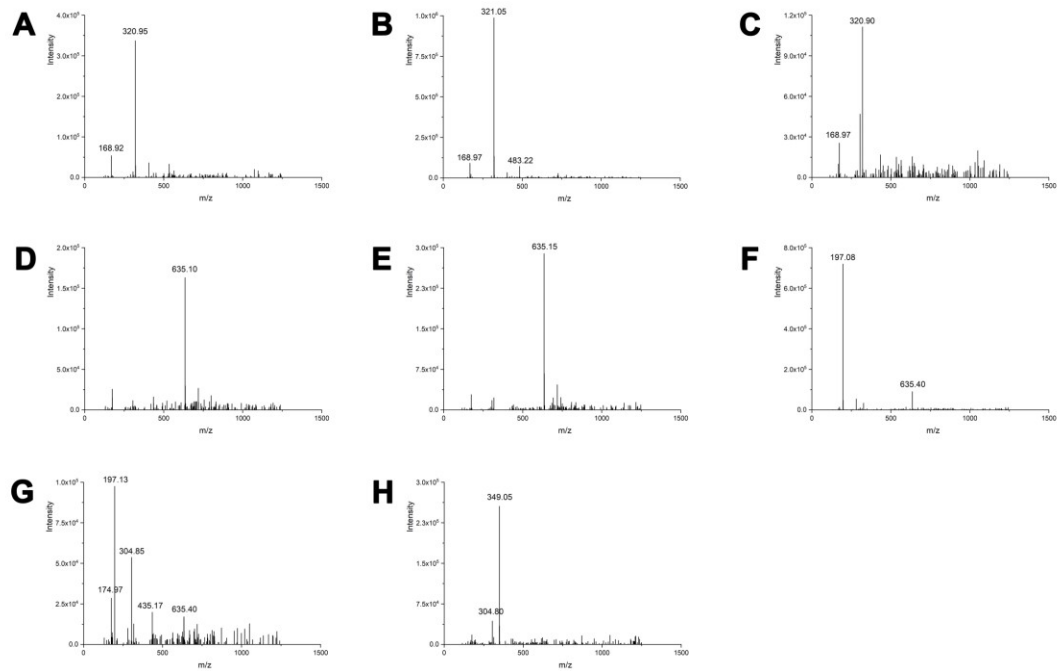

Fig. S3. The mass spectrum information of GTA. Figures A to H correspond to peaks 1 to 8 in Figure 4.

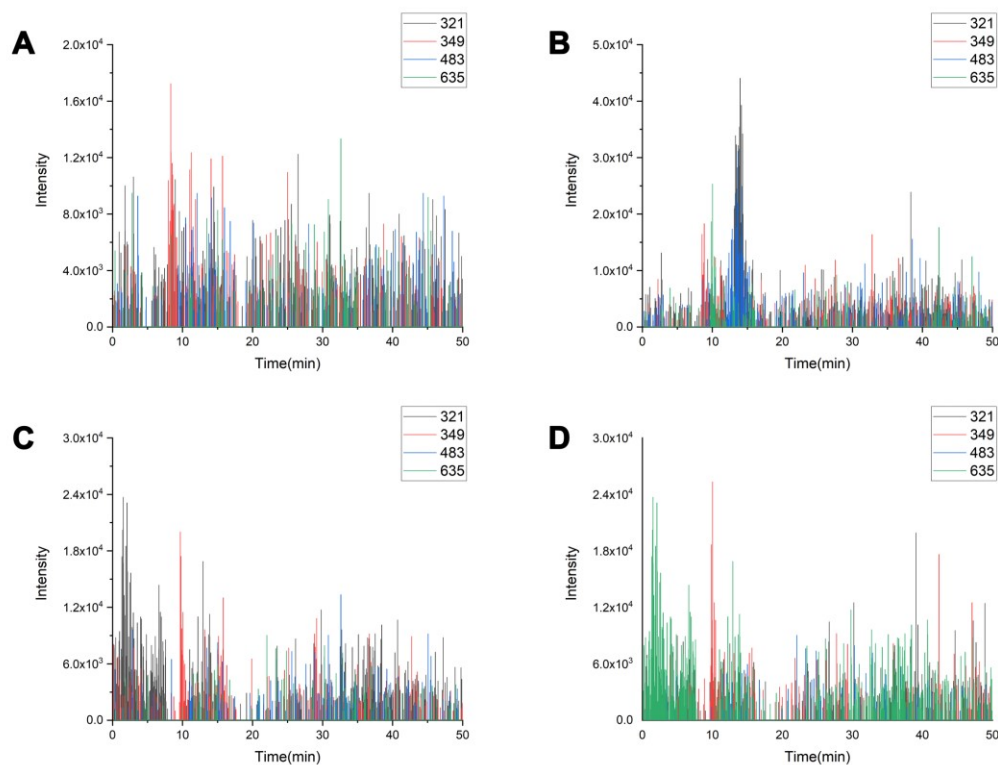

Fig. S4. Mass spectrometry information of components in intestinal juice and serum. (A) Peaks were extracted from the intestinal fluid of healthy mice after enema. (B) Peaks were extracted from the intestinal fluid in UC mice after enema administration. (C) Peaks were extracted from the serum components in healthy mice after enema administration. (D)

Peaks were extracted from the serum components in UC mice after enema administration.

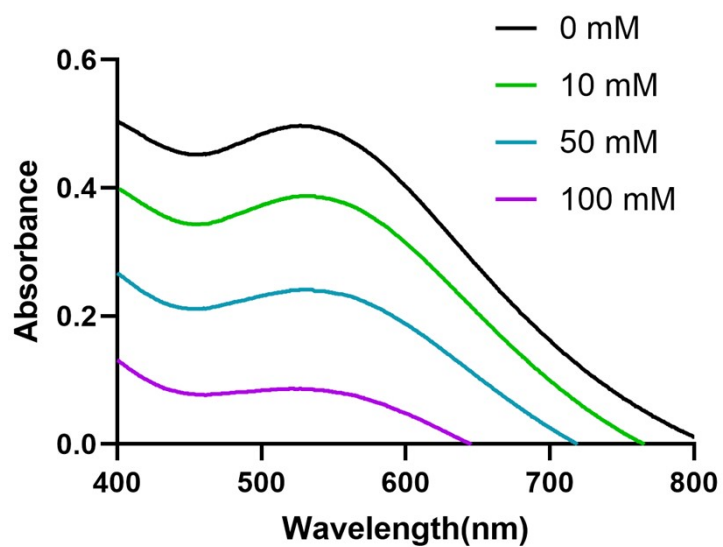

Figure S5. The disassembly of GTA-Fe<sup>III</sup> MCPs in different concentrations of H<sub>2</sub>O<sub>2</sub> solution

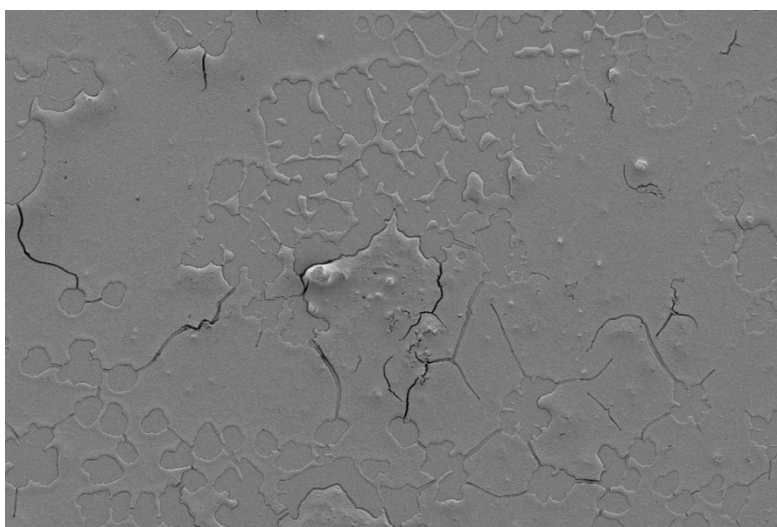

Figure S6. SEM image of GTA-Fe<sup>III</sup> MCPs in 100mM H<sub>2</sub>O<sub>2</sub> solution after 120 minutes
